# Supplementary material for: A controllable synthesis of hollow pumpkin-like CuO/Cu2O composites for ultrasensitive non-enzymatic glucose and hydrogen peroxide biosensors
Source: Royal Society of Chemistry journal article supplement (doi:10.1039/d0nj05038e), 2020-01-01
Supplement: d0nj05038e1.pdf [file d0nj05038e1.pdf]

## Supporting information

### **Controllable Synthesis of Hollow Pumpkin-like CuO/Cu<sub>2</sub>O Composites for Ultrasensitive Non-enzymatic Glucose and Hydrogen Peroxide Biosensors**

Xiaoqing Ma<sup>a,b</sup>, Kang-lai Tang<sup>b</sup>, Mingyu Yang<sup>b</sup>, Wenbing Shi<sup>a</sup>, Wenxi Zhao<sup>c\*</sup>

<sup>a</sup>School of Chemistry and Chemical Engineering, Yangtze Normal University, Chongqing, 408100, China

<sup>b</sup>Sports Medicine Center, Department of Orthopedic Surgery, Southwest Hospital, The 3rd Military Medical University, Chongqing, 400038, China

<sup>c</sup>School of Electronic Information Engineering, Yangtze Normal University, Chongqing, 408100, China

\*Corresponding author: Wenxi Zhao, E-mail: [zwx.168@163.com](mailto:zwx.168@163.com)

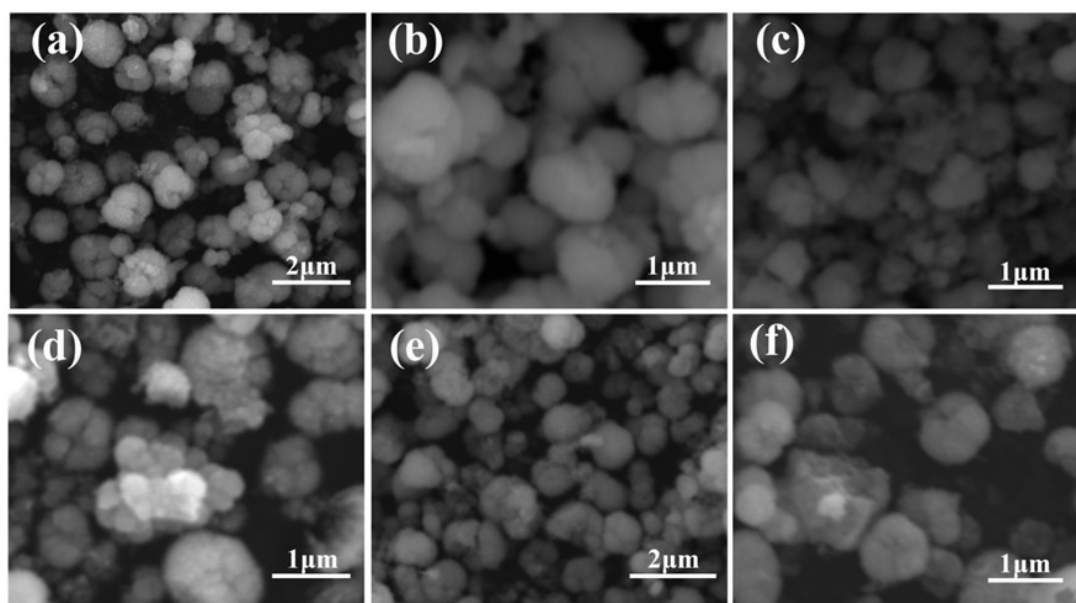

**Fig. S1.** Materials characterization. SEM images of pumpkin-like CuO/Cu<sub>2</sub>O composites obtained at 150 °C for (a) 9, (b) 12, (c) 18, (d) 24, (e) 30 and (f) 36 h.

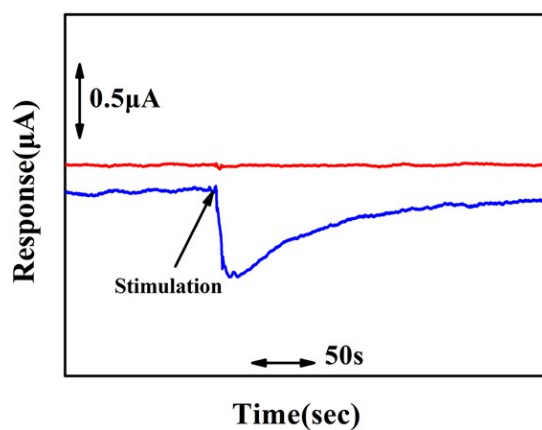

**Fig. S2.** Amperometric responses of modified electrode with the addition of stimulated agents in PBS solution with and without cells.

**Table S1.** Effect of reaction times on the phase composition of the CuO/Cu<sub>2</sub>O composites.

| Samples                       | 9h  | 12h  | 18h  | 24h  | 30h  | 36h  |
|-------------------------------|-----|------|------|------|------|------|
| $W_{\text{CuO}}(\%)$          | 100 | 89.8 | 83.0 | 69.6 | 43.0 | 33.2 |
| $W_{\text{Cu}_2\text{O}}(\%)$ | 0   | 7.2  | 17.0 | 30.4 | 57.0 | 66.8 |

**Table S2.** Performance comparison of reported glucose sensors based on the composition of CuO and Cu<sub>2</sub>O.

| Materials                                                   | Electrolyte | Sensitivity<br>( $\mu\text{A mM}^{-1} \text{cm}^{-2}$ ) | Detection<br>limit ( $\mu\text{M}$ ) | Linear<br>range<br>(mM) | Reference |
|-------------------------------------------------------------|-------------|---------------------------------------------------------|--------------------------------------|-------------------------|-----------|
| Cu <sub>x</sub> O/Cu                                        | 0.1M K      | 1620                                                    | 49                                   | Up to 6                 | [1]       |
| CuO/Cu <sub>2</sub> O NFs                                   | 0.1M NaOH   | 830                                                     | 0.7                                  | Up to 10                | [2]       |
| Cu/Cu <sub>2</sub> O/CuO HSs                                | 0.1M NaOH   | 8726                                                    | 0.39                                 | 0.0005 -30              | [3]       |
| CuO/Cu <sub>2</sub> O@CuO/Cu <sub>2</sub> O core-shell NWAs | 0.1M NaOH   | 10090                                                   | 0.48                                 | 0.00099-1.33            | [4]       |
| CuO/rGO/Cu <sub>2</sub> O/Cu                                | 0.1M NaOH   | 3401                                                    | 0.1                                  | 0.0005-8.266            | [5]       |
| Cu <sub>x</sub> O nanosheets/Cu                             | 0.1M NaOH   | 1541                                                    | 0.57                                 | Up to 4                 | [6]       |
| CuO/Cu <sub>2</sub> O nanowires                             | 0.075M NaOH | 1281                                                    | 16.7                                 | 0.05-2.0                | [7]       |
| Cu <sub>x</sub> O/PPy/Au                                    | 0.1M NaOH   | 232                                                     | 6.2                                  | Up to 8                 | [8]       |
| Cu/Cu <sub>x</sub> O/NC                                     | 0.1M NaOH   | —                                                       | 3.5                                  | 0-2.0; 2.0-5.0          | [9]       |
| Cu <sub>x</sub> O/Cu                                        | 0.5M NaOH   | 4848                                                    | —                                    | 0.01-0.2;0.5-1.6        | [10]      |
| CuO/ Cu <sub>2</sub> O composite                            | 0.1M NaOH   | 880                                                     | 0.108                                | Up to 15                | This work |

**Table S3.** Comparison of various sensors based on CuO and Cu<sub>2</sub>O for H<sub>2</sub>O<sub>2</sub> detection.

| Materials                        | Electrolyte  | Sensitivity<br>( $\mu\text{A mM}^{-1} \text{cm}^{-2}$ ) | Detection<br>limit<br>( $\mu\text{M}$ ) | Linear<br>range<br>(mM) | Reference |
|----------------------------------|--------------|---------------------------------------------------------|-----------------------------------------|-------------------------|-----------|
| CuO/rGO/Cu <sub>2</sub> O/Cu     | 0.1M PBS     | 3401.1                                                  | 0.1                                     | 0.0005-8.266            | [5]       |
| CuO@Cu <sub>2</sub> O-NWs/PVA    | PBS(PH=7)    | 39.5                                                    | 0.35                                    | 0.001-10                | [11]      |
| Cu <sub>2</sub> O/CuO@rGO        | 0.1M NaOH    | 431.65                                                  | 0.71                                    | 0.0015–11               | [12]      |
| Cu <sub>x</sub> O NPs@ZIF-8      | 0.1M NaOH    | 178                                                     | 0.15                                    | 0.0015–21.4             | [13]      |
| Cu <sub>x</sub> ONPs/GF          | PBS(pH=7.15) | 3437.5                                                  | 0.023                                   | 0.07-133                | [14]      |
| CuO/ Cu <sub>2</sub> O composite | 0.01M PBS    | 5154                                                    | 0.018                                   | 0.005-1.05              | This work |

## References

- [1] C. L. Li, Y. Su, S. W. Zhang, X. Y. Lv, H. L. Xia, and Y. J. Wang, *Biosensors and bioelectronics*, 2010, 26, 903-907.
- [2] N. Lu, C. L. Shao, X. H. Li, T. Shen, M. Y. Zhang, F. J. Miao, P. Zhang, X. Zhang, K. X. Wang, Y. Zhang, and Y. C. Liu, *Rsc Advances*, 2014, 4, 31056-1061.
- [3] L. Y. Lin, B. B. Karakocak, S. Kavadiya, T. Soundappan, P. Biswas, *Sensors and Actuators*. 2018,259,745-752
- [4] C. P. Yu, J. W. Cui, Y. Wang, H. M. Zheng, J. F. Zhang, X. Shu, J. Q. Liu, Y. Zhang, and Y. C. Wu, *Applied Surface Science*, 2018, 439, 11-17,
- [5] C. J. Zhao, X. Wu, P. W. Li, C. H. Zhao, X. Z. Qian, *Microchimica Acta*, 2017, 184, 2341-2348.
- [6] J. Lv, C. C. Kong, Y. Xu, Z. M. Yang, X. J. Zhang, S. C. Yang, G. Meng, J. L. Bi, J. H. Li, and S. Yang, *Sensors & Actuators B Chemical*, 2017, 248, 630-638.
- [7] Q. Q. Zhou, M. P. Zhuo, R. Chen, S. Z. Wang, Z. S. Wang, M. Zheng, and L. S. Liao, *Journal of Materials Chemistry C*, 2019, 7, 14874-14880.
- [8] F. H. Meng, W. Shi, Y. N. Sun, X. Zhu, G. S. Wu, C. Q. Ruan, X. Liu, and D. T. Ge. *Biosensors & Bioelectronics*, 2013, 42,141-147.
- [9] L. H. Ding, F. Yan, Y. H. Zhang, L. Liu, X. Yu, and H. Liu, *ACS Applied Nano Materials*, 2020, 3, 617-623.
- [10] S. C. Wang, L. Jiang, J. Hu, Q. S. Wang, S. H. Zhan, and Y. F. Lu, *Journal of Alloys and Compounds*, 2019, 815,152105.
- [11] F. Emanuela, C. Daniela, G. Maria, C. Malitesta, A. Tepore. *Talanta*, 2016, 147, 124-131.
- [12] D. M. Wu, Z. D. Xu, T. Zhang, Y. B. Shao, P. X. Xi, H. Li and C. L. Xu. *Rsc Advances*, 2016, 6, 103116-103123.
- [13] J. Yang, H. L. Ye, F. Q. Zhao, B. Z. Zeng, *Acs Applied Materials & Interfaces*, 2016, 8, 20407-20414.
- [14] J. F. Zeng, X. T. Ding, L. W. Chen, L. Jiao, Y. Z. Wang, D. W. Christopher, Q. Han, and L. T. Qu. *RSC Advances*, 2019, 9, 28207-28212.
